# Supplementary material
Source: PubMed Central journal article supplement (PMC4330775)
Supplement: pnas.201417143SI.pdf [file pnas.201417143SI.pdf]

# Supporting Information

Woodson and Litvin 10.1073/pnas.1417143112

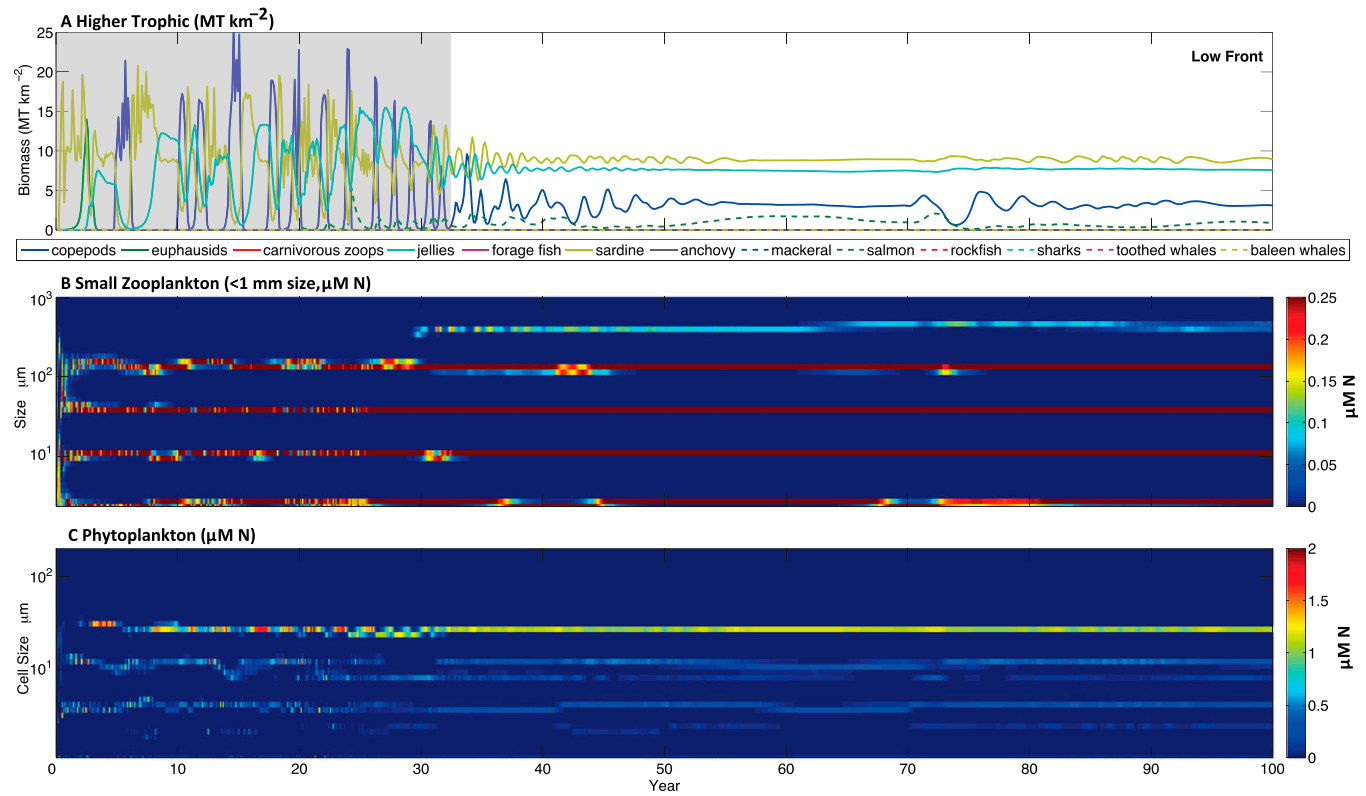

**Fig. S1.** Time series of abundance for all species classes for the no front model run. Convergence,  $\Delta U/\Delta x = 0 \text{ s}^{-1}$ , and nutrient supply was  $1 \mu\text{M N-d}^{-1}$ . (A) Higher trophic-level abundance in metric tons per square kilometer. (B) Microzooplankton abundance in micromolar N. (C) Phytoplankton abundance in micromolar N.

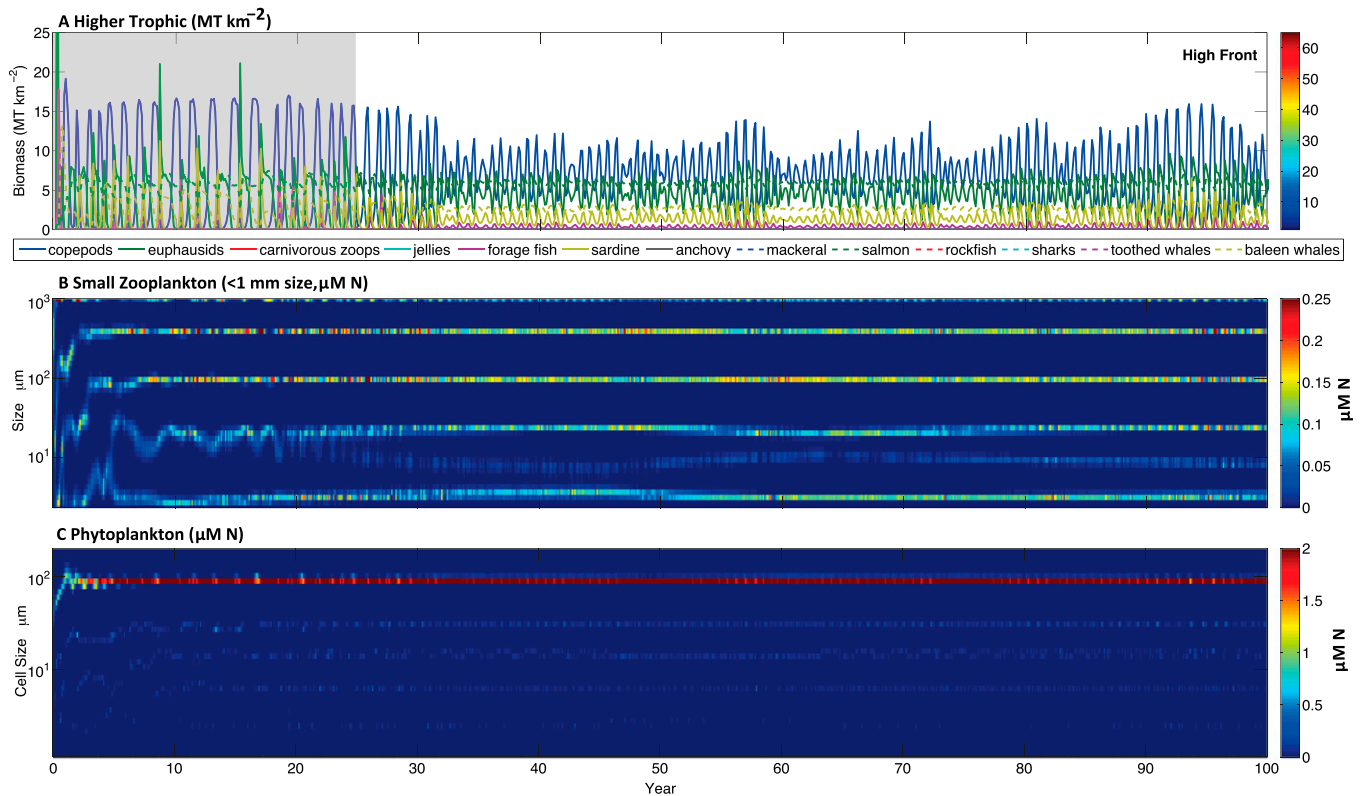

**Fig. S2.** Time series of abundance for all species classes for the front model run. Convergence,  $\Delta U/\Delta x = 0.05 \text{ s}^{-1}$ , and nutrient supply was  $1 \text{ } \mu\text{M N}\cdot\text{d}^{-1}$ . (A) Higher trophic-level abundance in metric tons per square kilometer. (B) Microzooplankton abundance in micromolar N. (C) Phytoplankton abundance in micromolar N.

**Table S1.** List of terms, definitions, and units

| Term                | Definition                                                  | Units                             |
|---------------------|-------------------------------------------------------------|-----------------------------------|
| $N$                 | Total amount of nitrate                                     | $\mu\text{M N}$                   |
| $S$                 | Nutrient flux                                               | $\mu\text{M N}\cdot\text{d}^{-1}$ |
| $\Delta U/\Delta X$ | Convergence rate                                            | $\text{s}^{-1}$                   |
| $\Delta x$          | Grid cell size                                              | m                                 |
| $du$                | Velocity change across grid cell in cross-frontal direction | $\text{m}\cdot\text{s}^{-1}$      |
| $w_{A,B}$           | Swimming speed of prey (A) or predator (B)                  | $\text{m}\cdot\text{s}^{-1}$      |
| $r_{P,Z,H}$         | Fraction of nutrient reincorporation for each class         | —                                 |
| $P_i$               | Biomass in terms of N of phytoplankton size class $i$       | $\mu\text{M N}$                   |
| $\mu_P^i$           | Growth rate of class $P_i$                                  | $\text{d}^{-1}$                   |
| $K_S^i$             | Half saturation rate of $P_i$                               | $\mu\text{M N}$                   |
| $m_P^i$             | Mortality rate of $P_i$                                     | —                                 |
| $w_P^i$             | Mean swim speed of $P_i$                                    | $\text{m}\cdot\text{s}^{-1}$      |
| $Z_j$               | Biomass in terms of N of zooplankton size class $j$         | $\mu\text{M N}$                   |
| $\varepsilon$       | Zooplankton growth efficiency                               | —                                 |
| $f_{eg}$            | Zooplankton fraction of grazing egested                     | —                                 |
| $\mu_Z^j$           | Growth rate of class $Z_j$                                  | $\text{d}^{-1}$                   |
| $\Phi_{ij}$         | Grazing preference of $Z_j$ on $P_i$                        | —                                 |
| $K_S^j$             | Half saturation rate of $Z_j$                               | $\mu\text{M N}$                   |
| $m_Z^j$             | Mortality rate of $Z_j$                                     | —                                 |
| $w_Z^j$             | Mean swim speed of $Z_j$                                    | $\text{m}\cdot\text{s}^{-1}$      |
| $H_k$               | Biomass in terms of N of higher trophic class $k$           | $\mu\text{M N}$                   |
| $\mu_H^k$           | Growth rate of class $H_k$                                  | $\text{d}^{-1}$                   |
| $\Phi_{jk}$         | Grazing preference of $H_k$ on $Z_j$                        | —                                 |
| $\Phi_{kk}$         | Grazing preference of $H_k$ on $H_k$                        | —                                 |
| $K_S^k$             | Half saturation rate of $P_i$                               | $\mu\text{M N}$                   |
| $m_H^k$             | Mortality rate of $H_k$                                     | $\text{d}^{-1}$                   |
| $w_H^k$             | Mean swim speed of $H_k$                                    | $\text{m}\cdot\text{s}^{-1}$      |

**Table S2. Prey preference matrix for higher trophic-level classes**

| Prey/predator class     | Carnivorous zooplankton |             |                         |         | Forage fishes |           |          |        | Sharks | Toothed whales | Baleen whales |            |
|-------------------------|-------------------------|-------------|-------------------------|---------|---------------|-----------|----------|--------|--------|----------------|---------------|------------|
|                         | Copepods                | Euphausiids | Carnivorous zooplankton | Jellies | Sardines      | Anchovies | Mackerel | Salmon |        |                |               | Rockfishes |
| Phytoplankton           | 0.80                    | 0.90        | 0.05                    | 0.05    | 0.50          | 0.30      |          |        |        |                |               |            |
| Microzooplankton        | 0.20                    | 0.05        | 0.50                    | 0.20    | 0.40          | 0.40      |          |        |        |                |               |            |
| Copepods                |                         | 0.05        | 0.15                    | 0.25    | 0.45          | 0.10      | 0.05     | 0.10   | 0.10   | 0.10           |               | 0.05       |
| Euphausiids             |                         |             | 0.25                    | 0.15    | 0.40          | 0.10      | 0.30     | 0.30   | 0.30   | 0.40           |               | 0.65       |
| Carnivorous zooplankton |                         |             | 0.05                    | 0.35    | 0.05          |           | 0.15     | 0.20   | 0.20   | 0.20           |               | 0.30       |
| Jellies                 |                         |             |                         |         |               |           |          |        |        |                |               |            |
| Forage fishes           |                         |             |                         |         |               |           |          |        |        |                |               |            |
| Sardines                |                         |             |                         |         |               |           | 0.20     | 0.30   | 0.20   | 0.30           | 0.30          | 0.40       |
| Anchovies               |                         |             |                         |         |               |           |          | 0.20   | 0.20   | 0.01           | 0.01          |            |
| Mackerel                |                         |             |                         |         |               |           |          | 0.10   | 0.10   | 0.01           | 0.28          | 0.20       |
| Salmon                  |                         |             |                         |         |               |           |          |        | 0.10   | 0.20           | 0.20          | 0.20       |
| Rockfishes              |                         |             |                         |         |               |           |          |        |        | 0.20           | 0.20          | 0.20       |
| Sharks                  |                         |             |                         |         |               |           |          |        |        |                |               |            |
| Toothed whales          |                         |             |                         |         |               |           |          |        |        |                |               |            |
| Baleen whales           |                         |             |                         |         |               |           |          |        |        |                |               |            |
